# Supplementary material for: Host-Driven Phosphorylation Appears to Regulate the Budding Activity of the Lassa Virus Matrix Protein
Source: Pathogens. 2018 Dec 9;7(4):97. doi: 10.3390/pathogens7040097 (PMC6313517; doi:10.3390/pathogens7040097)
Supplement: Supplementary file 1 [file pathogens-07-00097-s001.pdf]

A

LASV pY97 ; z=3 ; XCorr = 4.6

Sequence: LRPSAAPTAPPTGAADSIRPPY#SPDPAFLY

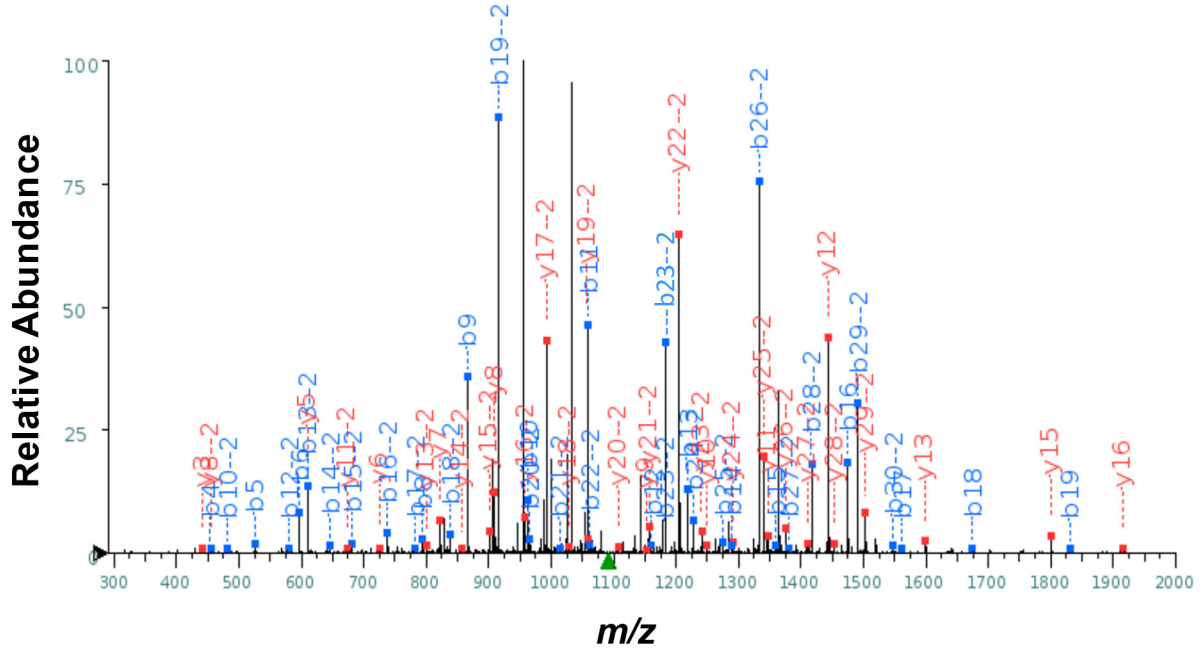Fragment Ions  $z=1$ 

| Seq # | b: $\Delta$ Error | b        | y        | y: $\Delta$ Error | +1 |
|-------|-------------------|----------|----------|-------------------|----|
| L 1   | ---               | 114.091  | ---      | ---               | 31 |
| R 2   | ---               | 270.192  | 3160.514 | ---               | 30 |
| P 3   | ---               | 367.245  | 3004.413 | ---               | 29 |
| S 4   | 196.209           | 454.277  | 2907.360 | ---               | 28 |
| A 5   | 326.564           | 525.314  | 2820.328 | ---               | 27 |
| A 6   | 104.742           | 596.351  | 2749.291 | ---               | 26 |
| P 7   | ---               | 693.404  | 2678.254 | ---               | 25 |
| T 8   | 63.674            | 794.452  | 2581.201 | ---               | 24 |
| A 9   | 54.847            | 865.489  | 2480.153 | ---               | 23 |
| P 10  | -1032.797         | 962.542  | 2409.116 | ---               | 22 |
| P 11  | -23.455           | 1059.595 | 2312.063 | ---               | 21 |
| T 12  | 94.315            | 1160.642 | 2215.011 | ---               | 20 |
| G 13  | 211.381           | 1217.664 | 2113.963 | ---               | 19 |
| A 14  | -28.611           | 1288.701 | 2056.942 | ---               | 18 |
| A 15  | -5.214            | 1359.738 | 1985.904 | ---               | 17 |
| D 16  | -256.396          | 1474.765 | 1914.867 | 42.302            | 16 |
| S 17  | -53.556           | 1561.797 | 1799.840 | -20.325           | 15 |
| I 18  | -81.185           | 1674.881 | 1712.808 | ---               | 14 |
| R 19  | 168.237           | 1830.982 | 1599.724 | -54.994           | 13 |
| P 20  | ---               | 1928.035 | 1443.623 | -75.123           | 12 |
| P 21  | ---               | 2025.088 | 1346.570 | 56.192            | 11 |
| P 22  | ---               | 2122.140 | 1249.518 | -162.087          | 10 |
| Y# 23 | ---               | 2365.170 | 1152.465 | 306.905           | 9  |
| S 24  | ---               | 2452.202 | 909.435  | -17.404           | 8  |
| P 25  | ---               | 2549.255 | 822.403  | 90.938            | 7  |
| D 26  | ---               | 2664.282 | 725.350  | 322.925           | 6  |
| P 27  | ---               | 2761.335 | 610.324  | -10.265           | 5  |
| A 28  | ---               | 2832.372 | 513.271  | ---               | 4  |
| F 29  | ---               | 2979.440 | 442.234  | 307.599           | 3  |
| L 30  | ---               | 3092.524 | 295.165  | ---               | 2  |
| Y 31  | ---               | ---      | 182.081  | ---               | 1  |

Fragment Ions  $z=2$ 

| Seq # | b: $\Delta$ Error | b        | y        | y: $\Delta$ Error | +1 |
|-------|-------------------|----------|----------|-------------------|----|
| L 1   | ---               | 57.549   | ---      | ---               | 31 |
| R 2   | ---               | 135.600  | 1580.761 | ---               | 30 |
| P 3   | ---               | 184.126  | 1502.710 | 234.080           | 29 |
| S 4   | ---               | 227.642  | 1454.184 | -11.470           | 28 |
| A 5   | ---               | 263.161  | 1410.668 | 8.355             | 27 |
| A 6   | ---               | 298.679  | 1375.149 | 155.283           | 26 |
| P 7   | ---               | 347.206  | 1339.631 | 199.754           | 25 |
| T 8   | ---               | 397.730  | 1291.104 | -157.095          | 24 |
| A 9   | ---               | 433.248  | 1240.580 | 494.106           | 23 |
| P 10  | 450.496           | 481.775  | 1205.062 | 212.378           | 22 |
| P 11  | ---               | 530.301  | 1156.535 | 206.952           | 21 |
| T 12  | 370.306           | 580.825  | 1108.009 | -11.650           | 20 |
| G 13  | 1608.629          | 609.335  | 1057.485 | 253.147           | 19 |
| A 14  | 461.048           | 644.854  | 1028.974 | -597.738          | 18 |
| A 15  | 208.467           | 680.373  | 993.456  | 736.640           | 17 |
| D 16  | -74.235           | 737.886  | 957.937  | -871.554          | 16 |
| S 17  | 207.824           | 781.402  | 900.424  | 184.999           | 15 |
| I 18  | -66.902           | 837.944  | 856.908  | -723.901          | 14 |
| R 19  | 84.701            | 915.995  | 800.366  | 159.260           | 13 |
| P 20  | 399.963           | 964.521  | 722.315  | ---               | 12 |
| P 21  | 102.701           | 1013.047 | 673.789  | -662.135          | 11 |
| P 22  | -346.784          | 1061.574 | 625.262  | ---               | 10 |
| Y# 23 | 242.804           | 1183.089 | 576.736  | ---               | 9  |
| S 24  | 209.901           | 1226.605 | 455.221  | -1881.465         | 8  |
| P 25  | 303.519           | 1275.131 | 411.705  | ---               | 7  |
| D 26  | 215.225           | 1332.645 | 363.179  | ---               | 6  |
| P 27  | 140.684           | 1381.171 | 305.665  | ---               | 5  |
| A 28  | 169.803           | 1416.689 | 257.139  | ---               | 4  |
| F 29  | 209.473           | 1490.224 | 221.620  | ---               | 3  |
| L 30  | 236.106           | 1546.766 | 148.086  | ---               | 2  |
| Y 31  | ---               | ---      | 91.544   | ---               | 1  |

B

LASV Y97, S98 ; z=3 ; XCorr = 2.6

Sequence: LRPSAAPTAPPTGAADSIRPPYSPDPAFLY

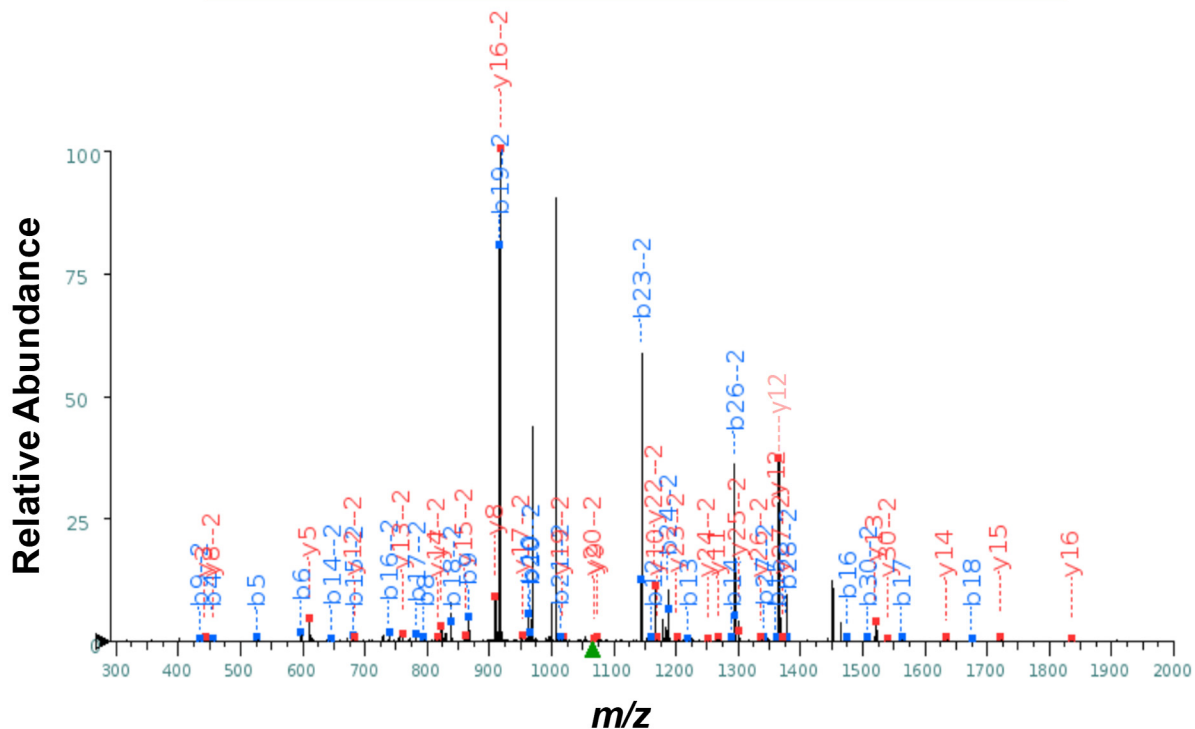Fragment Ions  $z=1$ 

| Seq # | b: $\Delta$ Error | b        | y        | y: $\Delta$ Error | +1 |
|-------|-------------------|----------|----------|-------------------|----|
| L 1   | ---               | 114.091  | ---      | ---               | 31 |
| R 2   | ---               | 270.192  | 3080.548 | ---               | 30 |
| P 3   | ---               | 367.245  | 2924.447 | ---               | 29 |
| S 4   | 548.565           | 454.277  | 2827.394 | ---               | 28 |
| A 5   | 470.638           | 525.314  | 2740.362 | ---               | 27 |
| A 6   | 168.589           | 596.351  | 2669.325 | ---               | 26 |
| P 7   | ---               | 693.404  | 2598.287 | ---               | 25 |
| T 8   | 156.998           | 794.452  | 2501.235 | ---               | 24 |
| A 9   | 88.551            | 865.489  | 2400.187 | ---               | 23 |
| P 10  | -52.805           | 962.542  | 2329.150 | ---               | 22 |
| P 11  | ---               | 1059.595 | 2232.097 | ---               | 21 |
| T 12  | -643.576          | 1160.642 | 2135.044 | ---               | 20 |
| G 13  | 269.799           | 1217.664 | 2033.997 | ---               | 19 |
| A 14  | 735.551           | 1288.701 | 1976.975 | ---               | 18 |
| A 15  | 559.426           | 1359.738 | 1905.938 | ---               | 17 |
| D 16  | -62.315           | 1474.765 | 1834.901 | 511.050           | 16 |
| S 17  | 525.416           | 1561.797 | 1719.874 | -8.198            | 15 |
| I 18  | 59.555            | 1674.881 | 1632.842 | 609.506           | 14 |
| R 19  | ---               | 1830.982 | 1519.758 | 603.781           | 13 |
| P 20  | ---               | 1928.035 | 1363.657 | 688.701           | 12 |
| P 21  | ---               | 2025.088 | 1266.604 | 731.063           | 11 |
| P 22  | ---               | 2122.140 | 1169.551 | 420.169           | 10 |
| Y 23  | ---               | 2285.204 | 1072.499 | -18.831           | 9  |
| S 24  | ---               | 2372.236 | 909.435  | -41.566           | 8  |
| P 25  | ---               | 2469.288 | 822.403  | 40.775            | 7  |
| D 26  | ---               | 2584.315 | 725.350  | ---               | 6  |
| P 27  | ---               | 2681.368 | 610.324  | 55.835            | 5  |
| A 28  | ---               | 2752.405 | 513.271  | ---               | 4  |
| F 29  | ---               | 2899.474 | 442.234  | 2226.869          | 3  |
| L 30  | ---               | 3012.558 | 295.165  | ---               | 2  |
| Y 31  | ---               | ---      | 182.081  | ---               | 1  |

Fragment Ions  $z=2$ 

| Seq # | b: $\Delta$ Error | b        | y        | y: $\Delta$ Error | +1 |
|-------|-------------------|----------|----------|-------------------|----|
| L 1   | ---               | 57.549   | ---      | ---               | 31 |
| R 2   | ---               | 135.600  | 1540.777 | ---               | 30 |
| P 3   | ---               | 184.126  | 1462.727 | ---               | 29 |
| S 4   | ---               | 227.642  | 1414.201 | ---               | 28 |
| A 5   | ---               | 263.161  | 1370.684 | -644.336          | 27 |
| A 6   | ---               | 298.679  | 1335.166 | 289.709           | 26 |
| P 7   | ---               | 347.206  | 1299.647 | 695.381           | 25 |
| T 8   | ---               | 397.730  | 1251.121 | 632.606           | 24 |
| A 9   | ---               | 433.248  | 1200.597 | 247.525           | 23 |
| P 10  | -194.689          | 481.775  | 1165.079 | 701.506           | 22 |
| P 11  | -1861.696         | 530.301  | 1116.552 | ---               | 21 |
| T 12  | ---               | 580.825  | 1068.026 | ---               | 20 |
| G 13  | ---               | 609.335  | 1017.502 | -495.047          | 19 |
| A 14  | 616.863           | 644.854  | 988.991  | -617.953          | 18 |
| A 15  | 575.715           | 680.373  | 953.473  | -414.394          | 17 |
| D 16  | 643.664           | 737.886  | 917.954  | -180.808          | 16 |
| S 17  | 972.319           | 781.402  | 860.441  | 372.829           | 15 |
| I 18  | 500.997           | 837.944  | 816.925  | 825.966           | 14 |
| R 19  | 504.373           | 915.995  | 760.383  | 468.064           | 13 |
| P 20  | 147.107           | 964.521  | 682.332  | -962.412          | 12 |
| P 21  | -965.230          | 1013.047 | 633.806  | ---               | 11 |
| P 22  | ---               | 1061.574 | 585.279  | ---               | 10 |
| Y 23  | 743.108           | 1143.105 | 536.753  | ---               | 9  |
| S 24  | 344.574           | 1186.621 | 455.221  | 497.281           | 8  |
| P 25  | 214.176           | 1235.148 | 411.705  | ---               | 7  |
| D 26  | 698.150           | 1292.661 | 363.179  | ---               | 6  |
| P 27  | -334.407          | 1341.188 | 305.665  | ---               | 5  |
| A 28  | 336.301           | 1376.706 | 257.139  | ---               | 4  |
| F 29  | ---               | 1450.240 | 221.620  | ---               | 3  |
| L 30  | ---               | 1506.783 | 148.086  | ---               | 2  |
| Y 31  | ---               | ---      | 91.544   | ---               | 1  |

C

LASV pS98 ; z=3 ; XCorr = 3.2

Sequence: LRPSAAPTAPPTGAADSIRPPYS#PDPAFLY

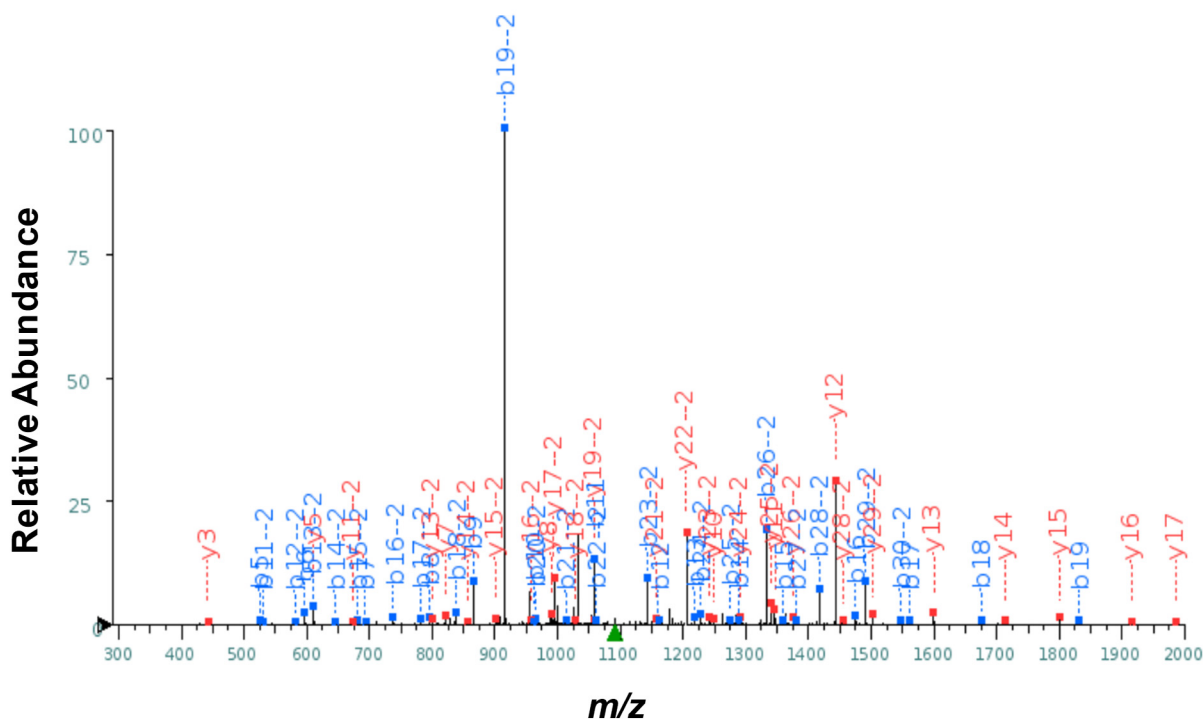Fragment Ions  $z=1$ 

| Seq # | b: $\Delta$ Error | b        | y        | y: $\Delta$ Error | +1 |
|-------|-------------------|----------|----------|-------------------|----|
| L 1   | ---               | 114.091  | ---      | ---               | 31 |
| R 2   | ---               | 270.192  | 3160.514 | ---               | 30 |
| P 3   | ---               | 367.245  | 3004.413 | ---               | 29 |
| S 4   | ---               | 454.277  | 2907.360 | ---               | 28 |
| A 5   | 153.760           | 525.314  | 2820.328 | ---               | 27 |
| A 6   | 88.881            | 596.351  | 2749.291 | ---               | 26 |
| P 7   | 318.102           | 693.404  | 2678.254 | ---               | 25 |
| T 8   | -1.701            | 794.452  | 2581.201 | ---               | 24 |
| A 9   | 46.949            | 865.489  | 2480.153 | ---               | 23 |
| P 10  | 42.312            | 962.542  | 2409.116 | ---               | 22 |
| P 11  | -166.336          | 1059.595 | 2312.063 | ---               | 21 |
| T 12  | 633.889           | 1160.642 | 2215.011 | ---               | 20 |
| G 13  | 164.683           | 1217.664 | 2113.963 | ---               | 19 |
| A 14  | 101.435           | 1288.701 | 2056.942 | ---               | 18 |
| A 15  | 253.004           | 1359.738 | 1985.904 | 29.354            | 17 |
| D 16  | -60.990           | 1474.765 | 1914.867 | 410.157           | 16 |
| S 17  | -45.895           | 1561.797 | 1799.840 | -34.569           | 15 |
| I 18  | -26.226           | 1674.881 | 1712.808 | -57.967           | 14 |
| R 19  | -17.476           | 1830.982 | 1599.724 | -104.754          | 13 |
| P 20  | ---               | 1928.035 | 1443.623 | -64.298           | 12 |
| P 21  | ---               | 2025.088 | 1346.570 | -726.303          | 11 |
| P 22  | ---               | 2122.140 | 1249.518 | -148.406          | 10 |
| Y 23  | ---               | 2285.204 | 1152.465 | ---               | 9  |
| S# 24 | ---               | 2452.202 | 989.402  | -65.374           | 8  |
| P 25  | ---               | 2549.255 | 822.403  | 209.648           | 7  |
| D 26  | ---               | 2664.282 | 725.350  | ---               | 6  |
| P 27  | ---               | 2761.335 | 610.324  | -5.965            | 5  |
| A 28  | ---               | 2832.372 | 513.271  | ---               | 4  |
| F 29  | ---               | 2979.440 | 442.234  | 178.962           | 3  |
| L 30  | ---               | 3092.524 | 295.165  | ---               | 2  |
| Y 31  | ---               | ---      | 182.081  | ---               | 1  |

Fragment Ions  $z=2$ 

| Seq # | b: $\Delta$ Error | b        | y        | y: $\Delta$ Error | +1 |
|-------|-------------------|----------|----------|-------------------|----|
| L 1   | ---               | 57.549   | ---      | ---               | 31 |
| R 2   | ---               | 135.600  | 1580.761 | ---               | 30 |
| P 3   | ---               | 184.126  | 1502.710 | 374.528           | 29 |
| S 4   | ---               | 227.642  | 1454.184 | -275.215          | 28 |
| A 5   | ---               | 263.161  | 1410.668 | ---               | 27 |
| A 6   | ---               | 298.679  | 1375.149 | 39.018            | 26 |
| P 7   | ---               | 347.206  | 1339.631 | -106.662          | 25 |
| T 8   | ---               | 397.730  | 1291.104 | -60.258           | 24 |
| A 9   | ---               | 433.248  | 1240.580 | -6.199            | 23 |
| P 10  | ---               | 481.775  | 1205.062 | 149.596           | 22 |
| P 11  | ---               | 530.301  | 1156.535 | -225.910          | 21 |
| T 12  | -157.312          | 580.825  | 1108.009 | ---               | 20 |
| G 13  | ---               | 609.335  | 1057.485 | ---               | 19 |
| A 14  | ---               | 644.854  | 1028.974 | 174.059           | 18 |
| A 15  | ---               | 680.373  | 993.456  | 633.689           | 17 |
| D 16  | 36.113            | 737.886  | 957.937  | 122.764           | 16 |
| S 17  | ---               | 781.402  | 900.424  | 407.473           | 15 |
| I 18  | 183.199           | 837.944  | 856.908  | ---               | 14 |
| R 19  | 225.519           | 915.995  | 800.366  | 450.012           | 13 |
| P 20  | 668.996           | 964.521  | 722.315  | -1077.593         | 12 |
| P 21  | 652.601           | 1013.047 | 673.789  | -579.510          | 11 |
| P 22  | -227.010          | 1061.574 | 625.262  | ---               | 10 |
| Y 23  | -26.711           | 1143.105 | 576.736  | ---               | 9  |
| S# 24 | 149.117           | 1226.605 | 495.204  | ---               | 8  |
| P 25  | -120.782          | 1275.131 | 411.705  | ---               | 7  |
| D 26  | 176.035           | 1332.645 | 363.179  | ---               | 6  |
| P 27  | -50.115           | 1381.171 | 305.665  | ---               | 5  |
| A 28  | 226.133           | 1416.689 | 257.139  | ---               | 4  |
| F 29  | 180.896           | 1490.224 | 221.620  | ---               | 3  |
| L 30  | 288.166           | 1546.766 | 148.086  | ---               | 2  |
| Y 31  | ---               | ---      | 91.544   | ---               | 1  |

**Supplemental Figure S1.** Mass spectrometry-based identification of Y97 and S98 phosphorylation sites in LASV Z. Low energy collision-induced dissociation MS/MS spectra of the doubly-digested (trypsin and chymotrypsin) peptide ions harboring (A) phosphorylated Y97, (B) unphosphorylated Y97 and S98, or (C) phosphorylated S98 on LASV Z protein. Tables indicate the theoretical  $m/z$  values for the fragment (1+ and 2+) ions. Red and blue font indicate observed values. S# and Y# denote phosphoserine and phosphotyrosine, respectively. Peptides include five amino acids (DPAFLY) of the affinity tag at the C-termini. Green triangles indicate the  $m/z$  values of the precursors. Precursor charge states and SEQUEST XCorr values are indicated.

# A

LASV pS18 ; z=2 ; XCorr= 1.5

Sequence: AS#LIPDATHLGPQFCK

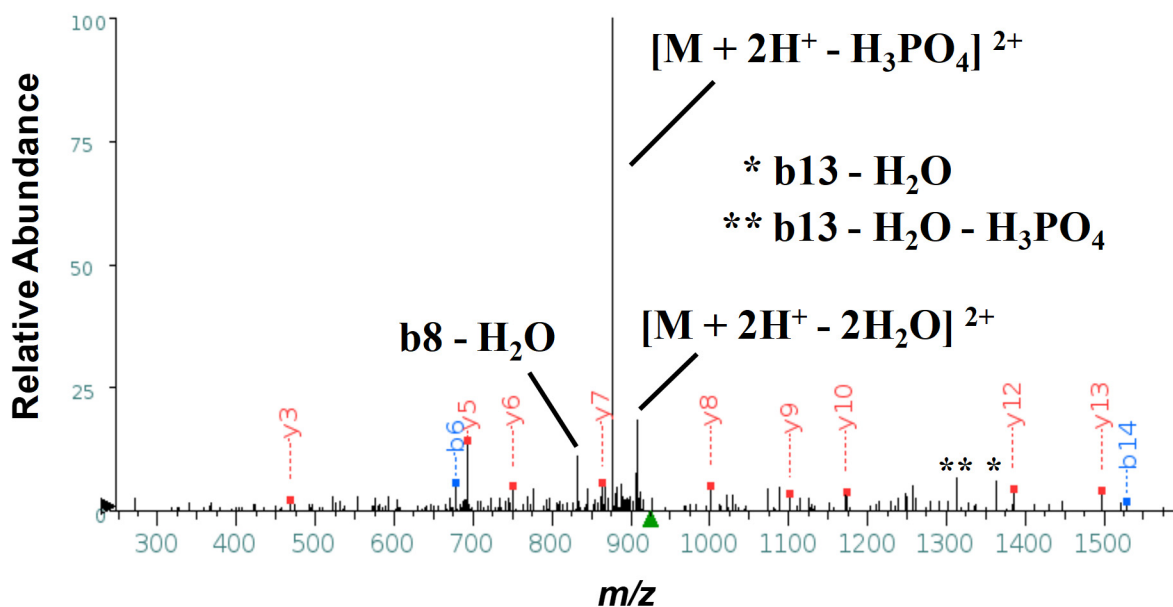

## Fragment Ions z=1

| Seq | #  | b: Δ Error | b        | y        | y: Δ Error | +1 |
|-----|----|------------|----------|----------|------------|----|
| A   | 1  | ---        | 72.044   | ---      | ---        | 16 |
| S#  | 2  | ---        | 239.043  | 1777.834 | ---        | 15 |
| L   | 3  | ---        | 352.127  | 1610.836 | ---        | 14 |
| I   | 4  | ---        | 465.211  | 1497.752 | -496.616   | 13 |
| P   | 5  | ---        | 562.264  | 1384.668 | 182.667    | 12 |
| D   | 6  | 1393.249   | 677.291  | 1287.615 | ---        | 11 |
| A   | 7  | ---        | 748.328  | 1172.588 | 428.448    | 10 |
| T   | 8  | ---        | 849.375  | 1101.551 | 21.875     | 9  |
| H   | 9  | ---        | 986.434  | 1000.503 | 758.684    | 8  |
| L   | 10 | ---        | 1099.518 | 863.444  | 96.634     | 7  |
| G   | 11 | ---        | 1156.540 | 750.360  | 28.427     | 6  |
| P   | 12 | ---        | 1253.593 | 693.339  | -524.573   | 5  |
| Q   | 13 | ---        | 1381.651 | 596.286  | ---        | 4  |
| F   | 14 | 85.616     | 1528.720 | 468.228  | 100.280    | 3  |
| C@  | 15 | ---        | 1702.766 | 321.159  | ---        | 2  |
| K   | 16 | ---        | ---      | 147.113  | ---        | 1  |

**B**

**LASV S18 ; z=2 ; XCorr = 4.1**

Sequence: ASLIPDATHLGPQFCK

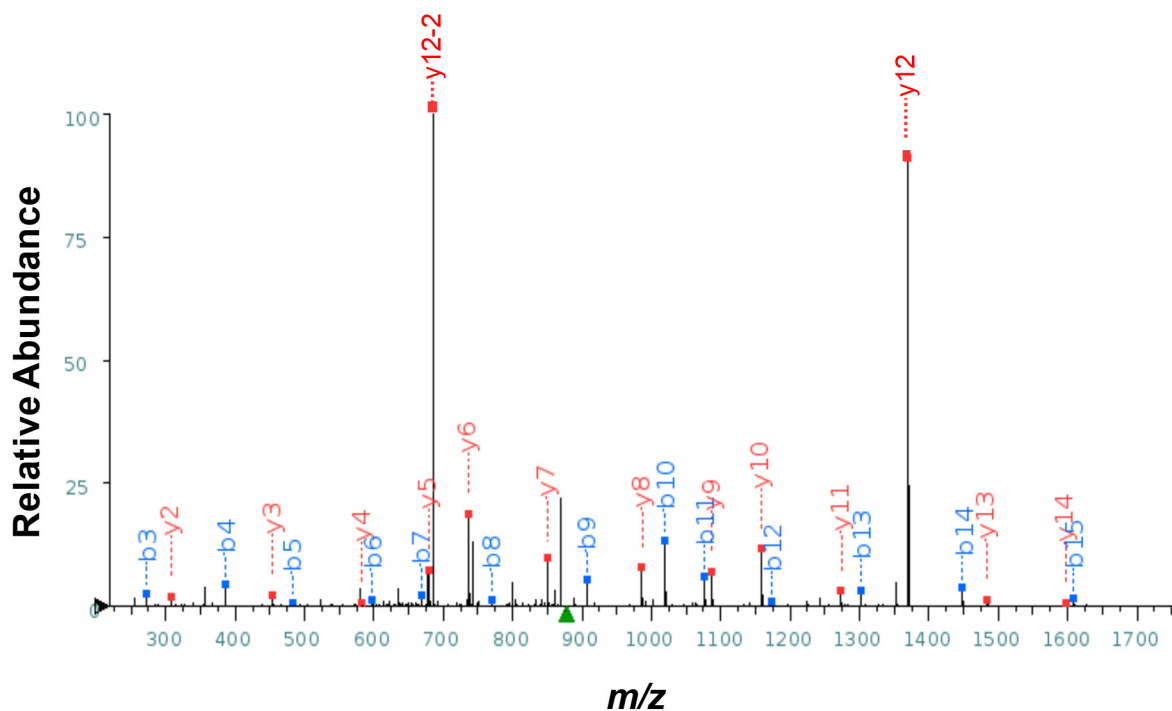

**Fragment Ions  $z=1$**

| Seq | #  | b: $\Delta$<br>Error | b        | y        | y: $\Delta$<br>Error | +1 |
|-----|----|----------------------|----------|----------|----------------------|----|
| A   | 1  | ---                  | 72.044   | ---      | ---                  | 16 |
| S   | 2  | ---                  | 159.076  | 1683.852 | ---                  | 15 |
| L   | 3  | -601.684             | 272.160  | 1596.820 | -17.786              | 14 |
| I   | 4  | -207.374             | 385.245  | 1483.736 | -59.569              | 13 |
| P   | 5  | 282.239              | 482.297  | 1370.652 | -25.058              | 12 |
| D   | 6  | -133.115             | 597.324  | 1273.599 | -37.488              | 11 |
| A   | 7  | -210.962             | 668.361  | 1158.572 | -18.270              | 10 |
| T   | 8  | 114.948              | 769.409  | 1087.535 | 2.766                | 9  |
| H   | 9  | -9.831               | 906.468  | 986.488  | -9.191               | 8  |
| L   | 10 | -49.170              | 1019.552 | 849.429  | -0.312               | 7  |
| G   | 11 | -16.213              | 1076.573 | 736.345  | 96.471               | 6  |
| P   | 12 | 108.448              | 1173.626 | 679.323  | 131.125              | 5  |
| Q   | 13 | -49.902              | 1301.685 | 582.270  | 464.893              | 4  |
| F   | 14 | -78.834              | 1448.753 | 454.212  | 87.046               | 3  |
| C   | 15 | -25.464              | 1608.784 | 307.143  | 214.616              | 2  |
| K   | 16 | ---                  | ---      | 147.113  | ---                  | 1  |

**Supplemental Figure S2.** Mass spectrometry-based identification of S18 phosphorylation site in LASV Z. Low energy collision-induced dissociation MS/MS spectra of the tryptic peptide ions harboring (A) phosphorylated or (B) unphosphorylated serine 18 on the LASV Z protein. Tables indicate the theoretical  $m/z$  values for the fragment (1+) ions. Red and blue font indicate observed values. S# denotes phosphoserine. Green triangles indicate the  $m/z$  values of the precursors. Spectra include cysteine with a mass increase of 71 Da for acrylamidation or 57 for carbamidomethylation. Major peaks unexplained by y- and b-type ions are labeled in A. Precursor charge states and SEQUEST XCorr values are indicated.
